# Supplementary material for: The Antibody Dependant Neurite Outgrowth Modulation Response (ADNM) involvement in Spinal Cord Injury
Source: Research Square preprint supplement (doi:10.21203/rs.3.rs-1349635/v1), 2022-02-11
Supplement: Supplementary file 1 [file 76b788bc4b4ad9c8391f35a9.docx]

**Supplementary Table 1**

**Supp. Table 1**: Immunoglobulins chains and Cluster of differentiation markers expression analyses in RNAseq libraries from of Dorsal Root Ganglion explant and primary culture of DRG neurons.

**Supplementary Figures**


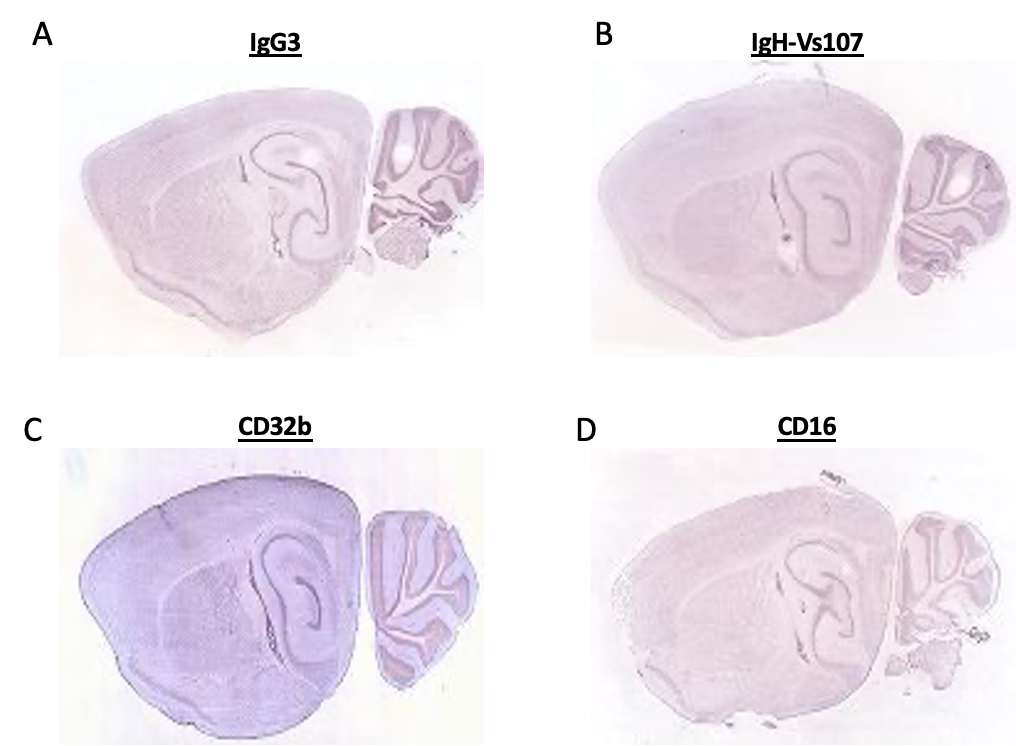


**Supp. Figure 1**: **A)** mRNA expression of IgG3, **B)** IgH-Vs107, **C)** CD32b and **D)** CD16 in Hippocampus and in Cerebellum of mice according to Allen Brain atlas, mRNA expression.


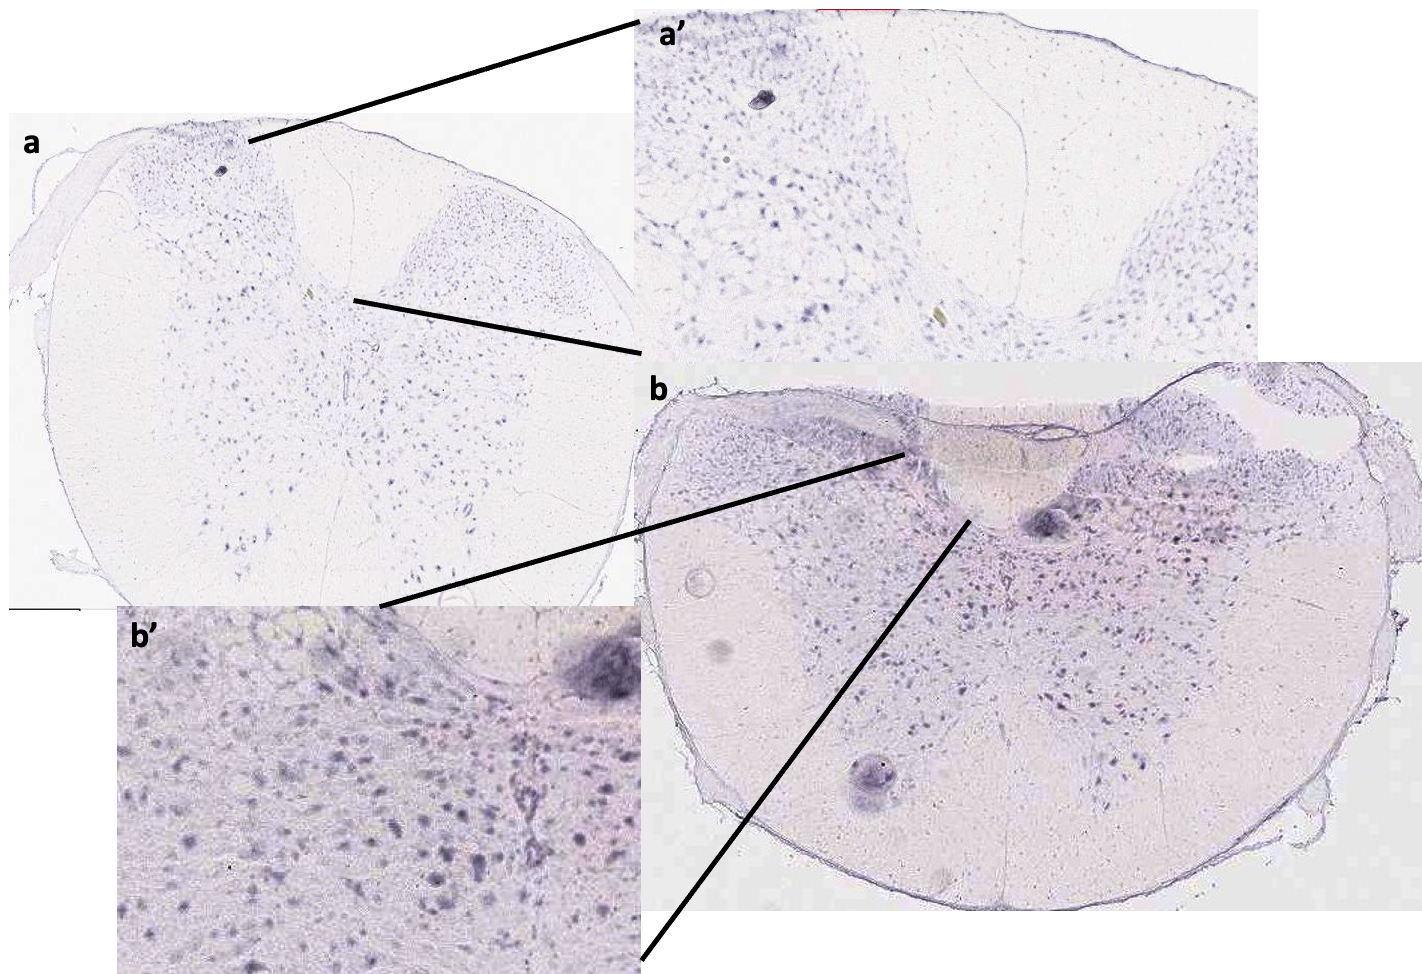


**Supp. Figure 2**: A) mRNA expression of IgG3 in spinal cord; of mice according to Allen Brain atlas, mRNA expression.


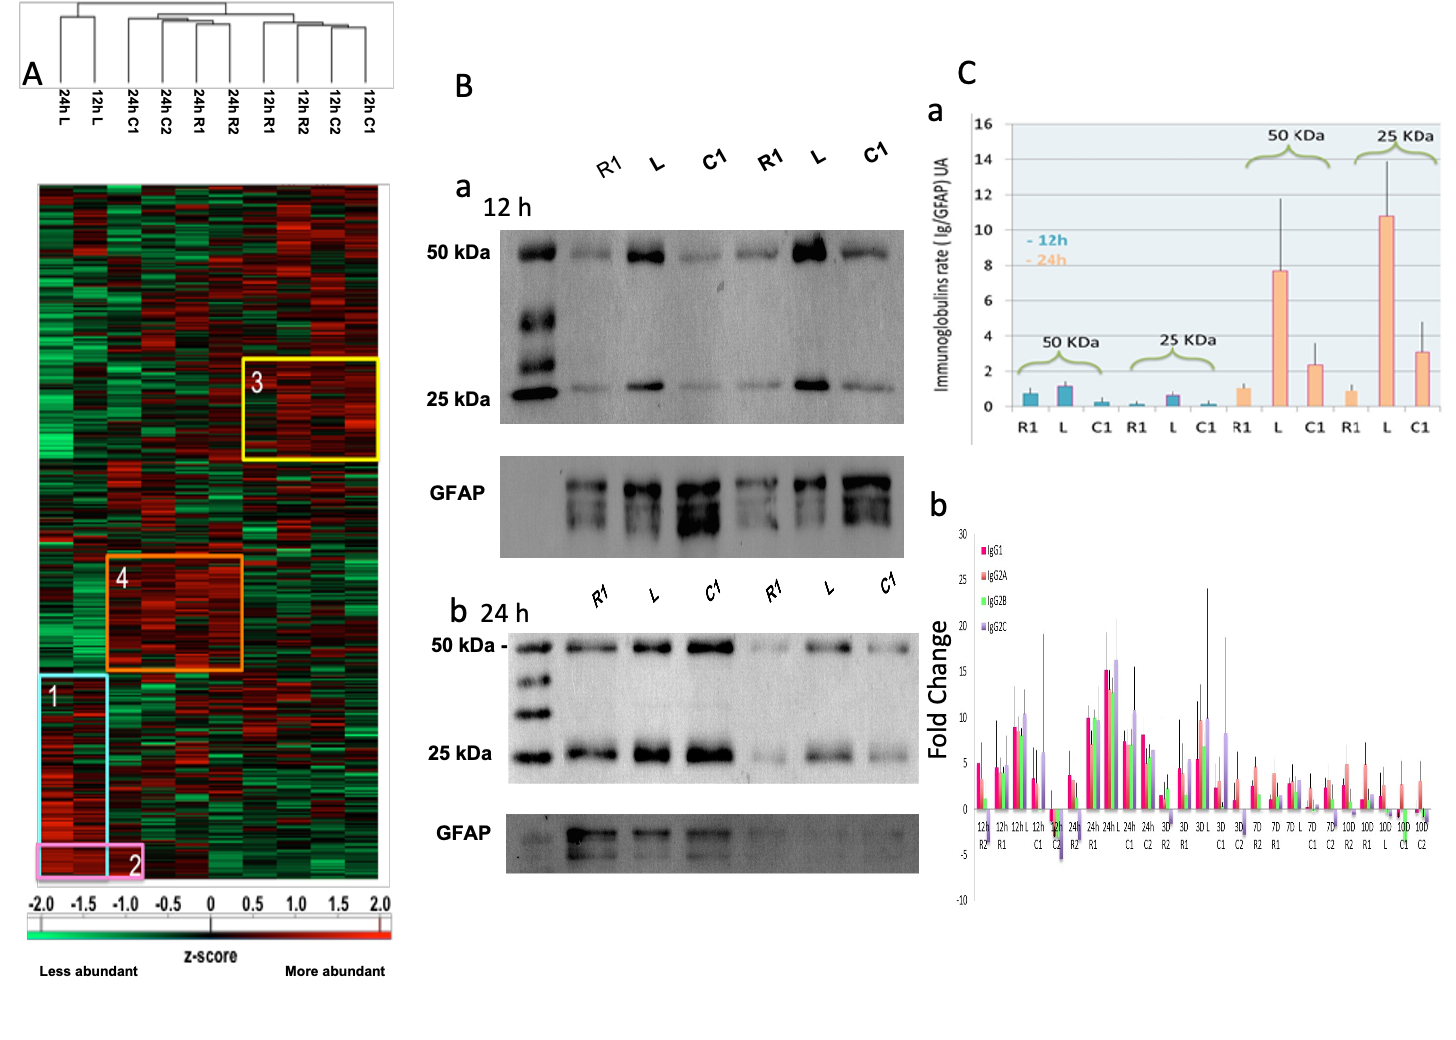


**Supp. Figure 3**: Heatmap illustrating hierarchical clustering obtained after analysis of digested peptides isolated from rostral, caudal and lesion segments collected 12h after lesion with or without treatment with RhoA inhibitor. Cluster 1 corresponds to the inflammatory proteins and immunoglobulins. Cluster 2 contains proteins involved in synaptogenesis and Cluster 3, proteins involved in neurite outgrowth.

**Supp. Figure 4**: Rodent mRNA species after NGS sequencing showing the highest fold changes in EAE spinal astrocytes as compared to control spinal cord astrocytes IgHa , IgKappa c, J Chain and CD32b have been identified in astrocytes from spinal cord and Cortex.
