# Supplementary material for: The Antibody Dependant Neurite Outgrowth Modulation Response (ADNM) involvement in Spinal Cord Injury
Source: Research Square preprint supplement (doi:10.21203/rs.3.rs-1349635/v1), 2022-02-11
Supplement: Supplementary file 2 [file b3d4b6d8add568449bea5fd7.docx]

**Table 2**: Label free intensity (intensity-based absolute quantification (IBAQ) value) of identified protein per segment and considering time after SCI. Value were calculated by MaxQuant and are proportional to the molar quantities of proteins. a) Variation of LFQ of IgG2a, IG2b and IgG2c isotypes along the spinal segments b) Variation of LFQ of Ig Lambda-2, IgG Kappa and Ig Mu isotypes along the spinal segments.

**Table 3.** Sequence coverage in the SCI data from the different isotypes and regions of immunoglobulins from secretome days after lesion.

**
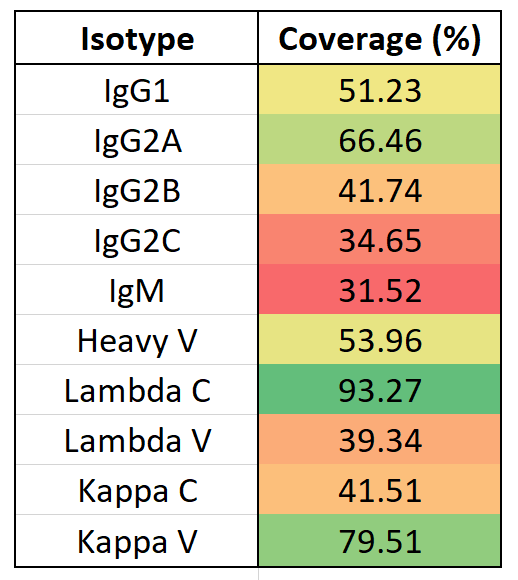
**
